# Supplementary material for: Bright photo- and triboluminescence of centrosymmetric Eu(iii) and Tb(iii) complexes with phosphine oxides containing azaheterocycles
Source: Royal Society of Chemistry journal article supplement (doi:10.1039/d1nj02441h), 2021-01-01
Supplement: d1nj02441h2.pdf [file d1nj02441h2.pdf]

*Supporting Information*

**Bright photo- and triboluminescence of centrosymmetric Eu(III) and Tb(III)  
complexes with phosphine oxides containing azaheterocycles**

**Yuliya A. Bryleva\***, Alexander V. Artem'ev, Ludmila A. Glinskaya,  
**Mariana I. Rakhmanova, Denis G. Samsonenko, Vladislav Yu. Komarov,**  
**Maxim I. Rogovoy, Maria P. Davydova**

*Nikolaev Institute of Inorganic Chemistry, Siberian Branch of the Russian Academy of Sciences, 3, Academician  
Lavrentiev Avenue, Novosibirsk 630090, Russian Federation*

---

\*Corresponding author

E-mail address: [bryleva@niic.nsc.ru](mailto:bryleva@niic.nsc.ru) (Yu. A. Bryleva)

## Contents

|                                                                                                                                                                                                                                                  |    |
|--------------------------------------------------------------------------------------------------------------------------------------------------------------------------------------------------------------------------------------------------|----|
| <b>Table S1.</b> Selected crystal, data collection and refinement parameters for complexes <b>1, 3, 5</b> .....                                                                                                                                  | 3  |
| <b>Table S2.</b> Selected bond lengths and angles for complexes <b>1, 3, and 5</b> .....                                                                                                                                                         | 4  |
| <b>Table S3.</b> Quantum yields, wavelengths of kinetics registration, lifetimes, and relative contribution of exponents to the number of emitted photons for Ph <sub>2</sub> P(O)Py, Ph <sub>2</sub> P(O)Pym, and Ph <sub>2</sub> P(O)Pyr ..... | 5  |
| <b>Figure S1.</b> FT-IR spectra of Ph <sub>2</sub> P(O)Py, Ph <sub>2</sub> P(O)Pym, Ph <sub>2</sub> P(O)Pyr, and complexes <b>1–6</b> .....                                                                                                      | 6  |
| <b>Figure S2.</b> Crystal structure of complex <b>1</b> .....                                                                                                                                                                                    | 7  |
| <b>Figure S3.</b> Crystal structure of complex <b>3</b> .....                                                                                                                                                                                    | 8  |
| <b>Figure S4.</b> Crystal structure of complex <b>5</b> .....                                                                                                                                                                                    | 9  |
| <b>Figure S5.</b> Simulated XRPD pattern of <b>1, 3, and 5</b> , and experimental ones of complexes <b>1–6</b> ...10                                                                                                                             |    |
| <b>Figure S6.</b> Normalized photoluminescence excitation spectra of Ph <sub>2</sub> P(O)Py, Ph <sub>2</sub> P(O)Pym, and Ph <sub>2</sub> P(O)Pyr at $\lambda_{em} = 370$ nm.....                                                                | 11 |
| <b>Fig. S7.</b> Photoluminescence spectra of Ph <sub>2</sub> P(O)Py, Ph <sub>2</sub> P(O)Pym, and Ph <sub>2</sub> P(O)Pyr.....                                                                                                                   | 12 |
| <b>Figure S8.</b> Normalized photoluminescence excitation spectra of the complexes [EuL <sub>2</sub> (hfac) <sub>3</sub> ] (L = Ph <sub>2</sub> P(O)Py, Ph <sub>2</sub> P(O)Pym, Ph <sub>2</sub> P(O)Pyr) .....                                  | 13 |
| <b>Fig. S9.</b> Normalized photoluminescence excitation spectra of the complexes [TbL <sub>2</sub> (hfac) <sub>3</sub> ] (L = Ph <sub>2</sub> P(O)Py, Ph <sub>2</sub> P(O)Pym, Ph <sub>2</sub> P(O)Pyr).....                                     | 14 |
| <b>Fig. S10.</b> Kinetics of photoluminescence decay of Ph <sub>2</sub> P(O)Py, Ph <sub>2</sub> P(O)Pym, and Ph <sub>2</sub> P(O)Pyr ..15                                                                                                        |    |

**Table S1.** Selected crystal, data collection and refinement parameters for complexes **1**, **3**, and **5**.

| Compound                                                     | <b>1</b>                                                                                       | <b>3</b>                                                                                       | <b>5</b>                                                                                       |
|--------------------------------------------------------------|------------------------------------------------------------------------------------------------|------------------------------------------------------------------------------------------------|------------------------------------------------------------------------------------------------|
| Empirical formula                                            | C <sub>49</sub> H <sub>31</sub> EuF <sub>18</sub> N <sub>2</sub> O <sub>8</sub> P <sub>2</sub> | C <sub>47</sub> H <sub>29</sub> EuF <sub>18</sub> N <sub>4</sub> O <sub>8</sub> P <sub>2</sub> | C <sub>47</sub> H <sub>29</sub> EuF <sub>18</sub> N <sub>4</sub> O <sub>8</sub> P <sub>2</sub> |
| Formula weight                                               | 1331.66                                                                                        | 1333.64                                                                                        | 1333.64                                                                                        |
| <i>T</i> (K)                                                 | 100(2)                                                                                         | 150(2)                                                                                         | 150(2)                                                                                         |
| Crystal system                                               | Triclinic                                                                                      | Monoclinic                                                                                     | Monoclinic                                                                                     |
| Space group                                                  | <i>P</i> -1                                                                                    | <i>P</i> 2 <sub>1</sub> / <i>c</i>                                                             | <i>P</i> 2 <sub>1</sub> / <i>c</i>                                                             |
| <i>a</i> (Å)                                                 | 12.7089(5)                                                                                     | 12.2249(2)                                                                                     | 12.6533(5)                                                                                     |
| <i>b</i> (Å)                                                 | 17.7622(7)                                                                                     | 22.3649(2)                                                                                     | 13.3458(5)                                                                                     |
| <i>c</i> (Å)                                                 | 20.0802(10)                                                                                    | 19.3523(2)                                                                                     | 30.1222(15)                                                                                    |
| <i>α</i> (°)                                                 | 81.090(2)                                                                                      | 108.084(1)                                                                                     | 90.640(4)                                                                                      |
| <i>β</i> (°)                                                 | 88.144(2)                                                                                      |                                                                                                |                                                                                                |
| <i>γ</i> (°)                                                 | 88.268(2)                                                                                      |                                                                                                |                                                                                                |
| Volume (Å <sup>3</sup> )                                     | 5142.8(4)                                                                                      | 5029.7(1)                                                                                      | 5086.4(4)                                                                                      |
| <i>Z</i>                                                     | 4                                                                                              | 4                                                                                              | 4                                                                                              |
| Calculated density (g cm <sup>-3</sup> )                     | 1.720                                                                                          | 1.761                                                                                          | 1.742                                                                                          |
| <i>μ</i> (mm <sup>-1</sup> )                                 | 1.402                                                                                          | 1.44                                                                                           | 1.42                                                                                           |
| Crystal size                                                 | 0.17 × 0.13 × 0.05                                                                             | 0.22 × 0.17 × 0.13                                                                             | 0.22 × 0.19 × 0.07                                                                             |
| <i>T</i> <sub>min</sub> / <i>T</i> <sub>max</sub>            | 0.660/ 0.746                                                                                   | 0.841/ 1.0                                                                                     | 0.949/ 1.000                                                                                   |
| Reflections collected                                        | 94520 [ <i>R</i> (int) = 0.038]                                                                | 37209 [ <i>R</i> (int) = 0.018]                                                                | 22730 [ <i>R</i> (int) = 0.024]                                                                |
| Independent reflections                                      | 32502                                                                                          | 11316                                                                                          | 10992                                                                                          |
| Observed reflections [ <i>I</i> > 2 <i>σ</i> ( <i>I</i> )]   | 24970                                                                                          | 10084                                                                                          | 9383                                                                                           |
| Number of parameters refined                                 | 1459                                                                                           | 990                                                                                            | 892                                                                                            |
| Goodness-of-fit on <i>F</i> <sup>2</sup>                     | 1.01                                                                                           | 1.04                                                                                           | 1.11                                                                                           |
| Final <i>R</i> indices [ <i>I</i> ≥ 2 <i>σ</i> ( <i>I</i> )] | <i>R</i> <sub>1</sub> = 0.0378                                                                 | <i>R</i> <sub>1</sub> = 0.023                                                                  | <i>R</i> <sub>1</sub> = 0.038                                                                  |
| <i>R</i> indices (all data)                                  | <i>w R</i> <sub>2</sub> = 0.0745                                                               | <i>w R</i> <sub>2</sub> = 0.057                                                                | <i>w R</i> <sub>2</sub> = 0.080                                                                |
| $\Delta\rho_{\max}/\Delta\rho_{\min}$ (e Å <sup>-3</sup> )   | 1.15/ -1.35                                                                                    | 0.60/ -0.30                                                                                    | 0.97/ -0.70                                                                                    |

**Table S2.** Selected bond lengths and angles for complexes **1**, **3**, and **5**.

| <b>1</b>   |                  |            |                  | <b>3</b>   |                  | <b>5</b>   |                  |
|------------|------------------|------------|------------------|------------|------------------|------------|------------------|
| Bond       | Bond lengths (Å) |
| Eu1–O1     | 2.338(2)         | Eu2–O3     | 2.338(2)         | Eu1–O1     | 2.366(1)         | Eu1–O1     | 2.325(2)         |
| Eu1–O2     | 2.330(2)         | Eu2–O4     | 2.316(2)         | Eu1–O2     | 2.381(1)         | Eu1–O2     | 2.321(2)         |
| Eu1–O11    | 2.412(2)         | Eu2–O41    | 2.407(2)         | Eu1–O11    | 2.501(1)         | Eu1–O11    | 2.389(2)         |
| Eu1–O12    | 2.407(2)         | Eu2–O42    | 2.441(2)         | Eu1–O12    | 2.399(1)         | Eu1–O12    | 2.425(2)         |
| Eu1–O21    | 2.387(2)         | Eu2–O51    | 2.366(2)         | Eu1–O21    | 2.426(1)         | Eu1–O21    | 2.404(2)         |
| Eu1–O22    | 2.431(2)         | Eu2–O52    | 2.439(7)         | Eu1–O22    | 2.377(1)         | Eu1–O22    | 2.410(2)         |
| Eu1–O31    | 2.402(2)         | Eu2–O61    | 2.412(2)         | Eu1–O31    | 2.517(1)         | Eu1–O31    | 2.430(2)         |
| Eu1–O32    | 2.418(2)         | Eu2–O62    | 2.400(2)         | Eu1–O32    | 2.409(1)         | Eu1–O32    | 2.381(2)         |
|            |                  |            |                  | Eu1–N12    | 2.822(2)         |            |                  |
| P1–O1      | 1.500(2)         | P3–O3      | 1.498(2)         | P1–O1      | 1.495(1)         | P1–O1      | 1.494(2)         |
| P1–C101    | 1.807(3)         | P3–C301    | 1.805(3)         | P1–C101    | 1.816(2)         | P1–C101    | 1.802(4)         |
| P1–C105    | 1.804(3)         | P3–C306    | 1.799(3)         | P1–C105    | 1.793(2)         | P1–C105    | 1.793(3)         |
| P1–C112    | 1.798(2)         | P3–C312    | 1.804(3)         | P1–C111    | 1.791(2)         | P1–C111    | 1.797(3)         |
| P2–O2      | 1.501(2)         | P4–O4      | 1.500(2)         | P2–O2      | 1.489(2)         | P2–O2      | 1.489(2)         |
| P2–C201    | 1.799(3)         | P4–C401    | 1.796(3)         | P2–C201    | 1.822(2)         | P2–C201    | 1.822(2)         |
| P2–C206    | 1.800(3)         | P4–C406    | 1.795(3)         | P2–C205    | 1.799(2)         | P2–C205    | 1.799(2)         |
| P2–C212    | 1.807(2)         | P4–C412    | 1.806(3)         | P2–C211    | 1.797(2)         | P2–C211    | 1.797(2)         |
|            |                  |            |                  |            |                  |            |                  |
| Angle      | Angle size (°)   |
| O1–Eu1–O2  | 145.70(6)        | O3–Eu2–O4  | 145.00(6)        | O1–Eu1–O2  | 85.93(5)         | O1–Eu1–O2  | 145.53(8)        |
| O1–Eu1–O11 | 141.02(6)        | O3–Eu2–O41 | 71.98(6)         | O1–Eu1–O11 | 147.57(4)        | O1–Eu1–O11 | 72.20(8)         |
| O1–Eu1–O12 | 72.32(6)         | O3–Eu2–O42 | 140.36(6)        | O1–Eu1–O12 | 134.57(4)        | O1–Eu1–O12 | 139.39(8)        |
| O1–Eu1–O21 | 81.67(6)         | O3–Eu2–O51 | 85.35(6)         | O1–Eu1–O21 | 133.09(5)        | O1–Eu1–O21 | 113.03(8)        |
| O1–Eu1–O22 | 80.10(6)         | O3–Eu2–O52 | 77.83(6)         | O1–Eu1–O22 | 81.89(5)         | O1–Eu1–O22 | 73.10(8)         |
| O1–Eu1–O31 | 72.78(6)         | O3–Eu2–O61 | 73.64(6)         | O1–Eu1–O31 | 70.54(5)         | O1–Eu1–O31 | 78.66(8)         |
| O1–Eu1–O32 | 111.31(6)        | O3–Eu2–O62 | 109.30(6)        | O1–Eu1–O32 | 73.62(4)         | O1–Eu1–O32 | 83.07(8)         |
| O2–Eu1–O11 | 72.96(6)         | O4–Eu2–O41 | 142.77(6)        | O2–Eu1–O11 | 74.25(5)         | O2–Eu1–O11 | 141.62(8)        |
| O2–Eu1–O12 | 141.38(6)        | O4–Eu2–O42 | 73.98(6)         | O2–Eu1–O12 | 85.31(5)         | O2–Eu1–O12 | 74.35(8)         |
| O2–Eu1–O21 | 106.73(6)        | O4–Eu2–O51 | 101.90(6)        | O2–Eu1–O21 | 139.12(5)        | O2–Eu1–O21 | 77.80(9)         |
| O2–Eu1–O22 | 72.05(6)         | O4–Eu2–O52 | 72.64(6)         | O2–Eu1–O22 | 72.05(6)         | O2–Eu1–O22 | 80.71(8)         |
| O2–Eu1–O31 | 80.40(6)         | O4–Eu2–O61 | 79.85(6)         | O2–Eu1–O31 | 140.92(5)        | O2–Eu1–O31 | 72.22(8)         |
| O2–Eu1–O32 | 78.26(6)         | O4–Eu2–O62 | 82.33(6)         | O2–Eu1–O32 | 75.08(5)         | O2–Eu1–O32 | 103.69(8)        |

**Table S3.** Quantum yields ( $\Phi_{TOT}$ ), wavelengths of kinetics registration ( $\lambda_{reg}$ ), lifetimes ( $\tau_i$ ), and relative contribution of exponents to the number of emitted photons  $N(\%) = 100 \times A_i \tau_i / \sum_i A_i \tau_i$  at the fitting of the kinetics (Fig. S10) in the two-exponential approximation for Ph<sub>2</sub>P(O)Py, Ph<sub>2</sub>P(O)Pym, and Ph<sub>2</sub>P(O)Pyr in the solid state at 300 K ( $\lambda_{ex} = 350$  nm).

| Compound                | $\Phi_{TOT}$ , % | $\lambda_{reg}$ , nm | $\tau_1$ , ns | $N_1$ , % | $\tau_2$ , ns | $N_2$ , % |
|-------------------------|------------------|----------------------|---------------|-----------|---------------|-----------|
| Ph <sub>2</sub> P(O)Py  | 8.5              | 400                  | 4.7           | –         | –             | –         |
|                         |                  | 500                  | 8.7           | 99.8      | 113           | 0.2       |
| Ph <sub>2</sub> P(O)Pym | 7                | 400                  | 7.8           | –         | –             | –         |
|                         |                  | 500                  | 11.9          | 99.96     | 3.1           | 0.04      |
| Ph <sub>2</sub> P(O)Pyr | 7                | 400                  | 4.1           | –         | –             | –         |
|                         |                  | 500                  | 71.2          | 99.98     | 5.8           | 0.02      |

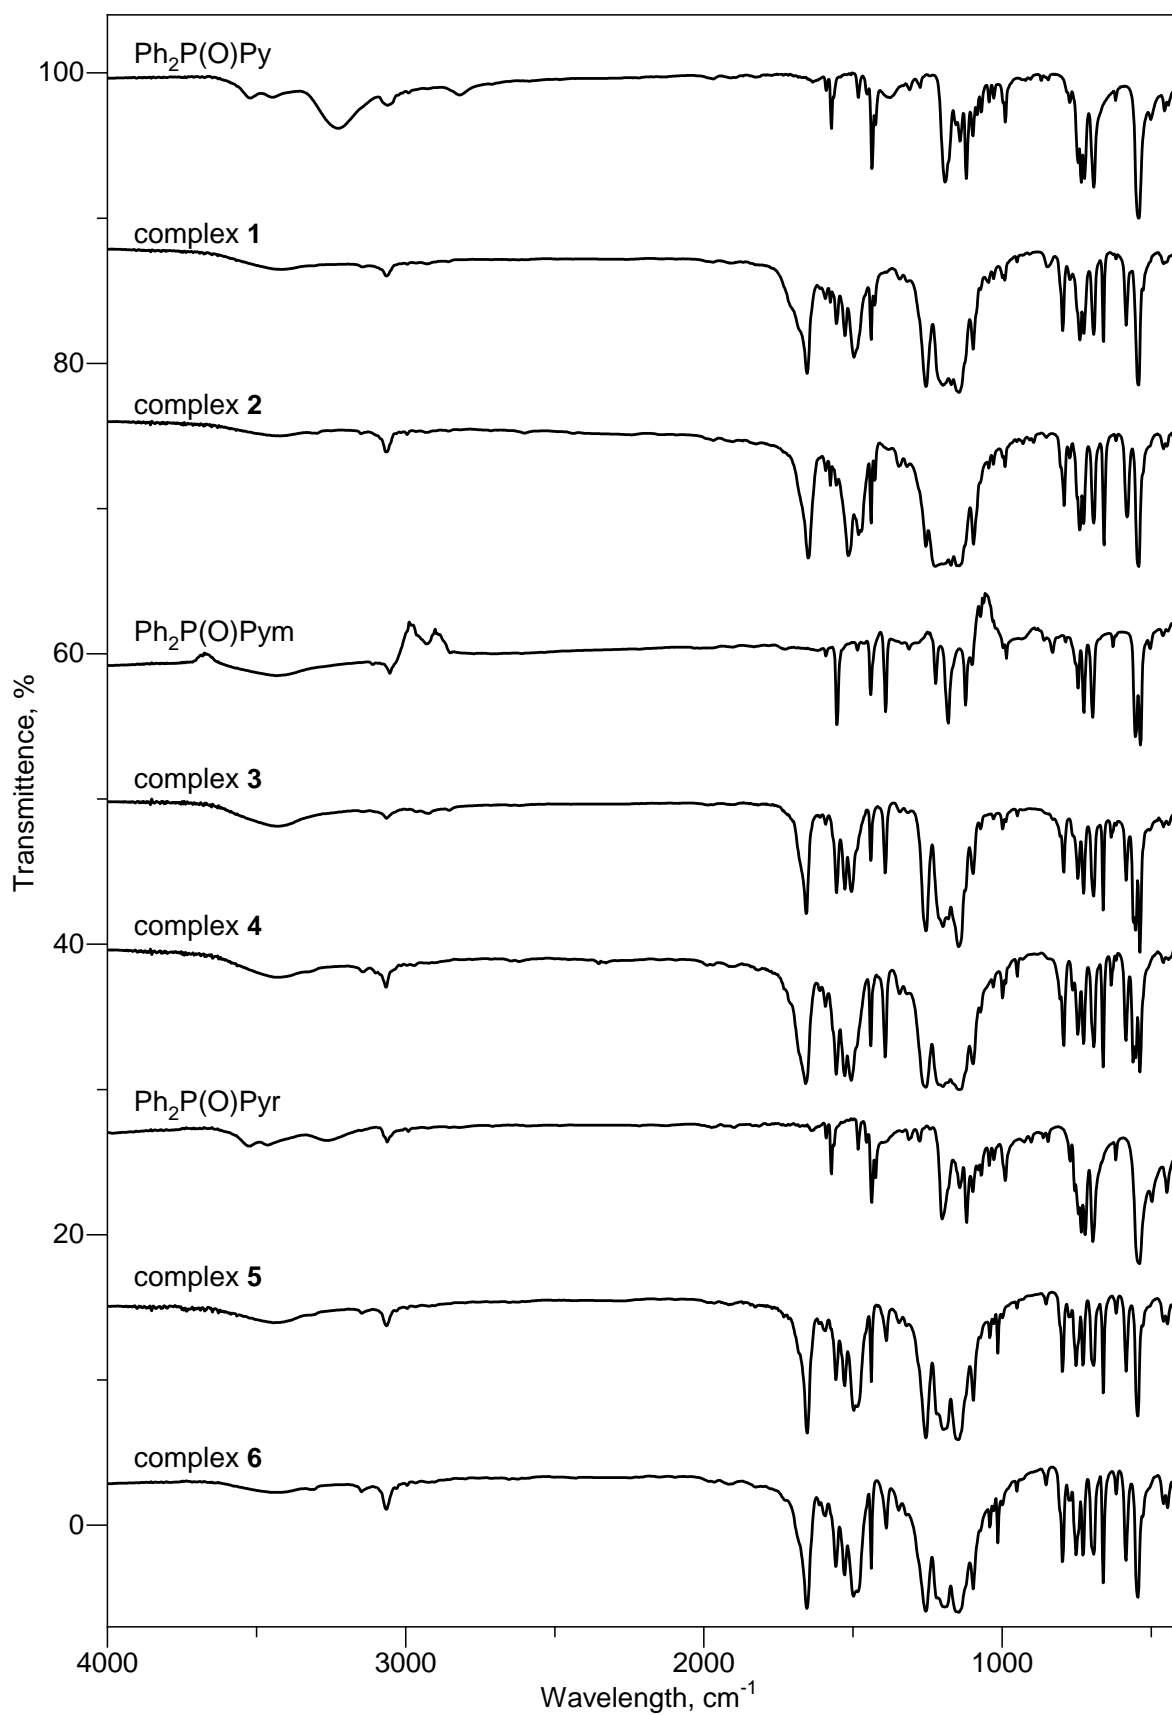

**Figure S1.** FT-IR spectra of Ph<sub>2</sub>P(O)Py, Ph<sub>2</sub>P(O)Pym, Ph<sub>2</sub>P(O)Pyr and complexes 1–6.

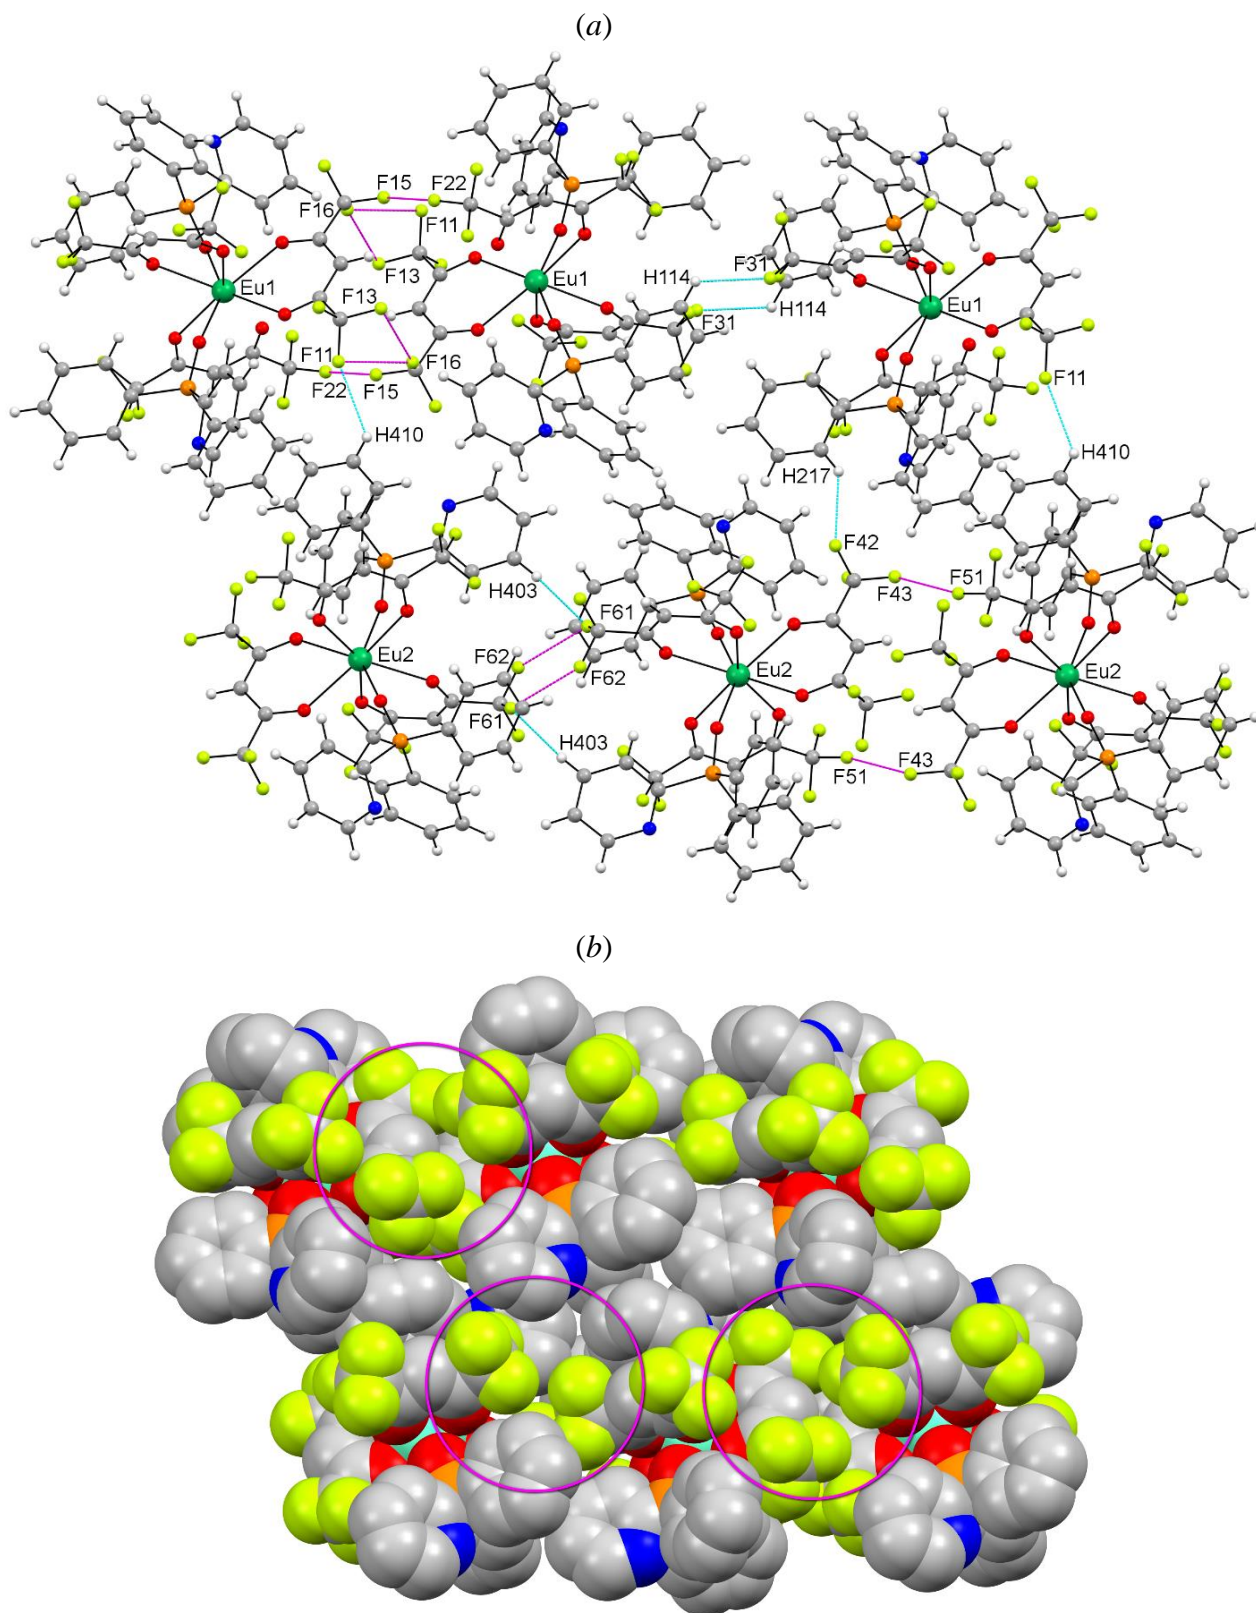

**Figure S2.** (a) Crystal structure of complex **1** focused on intermolecular C–H...F (cyan) and F...F (magenta) contacts, disordered atom positions are omitted for clarity; (b) space filling model focused on the intermolecular CF<sub>3</sub> arrangement in **1** (disordered atom positions and hydrogen atoms are omitted).





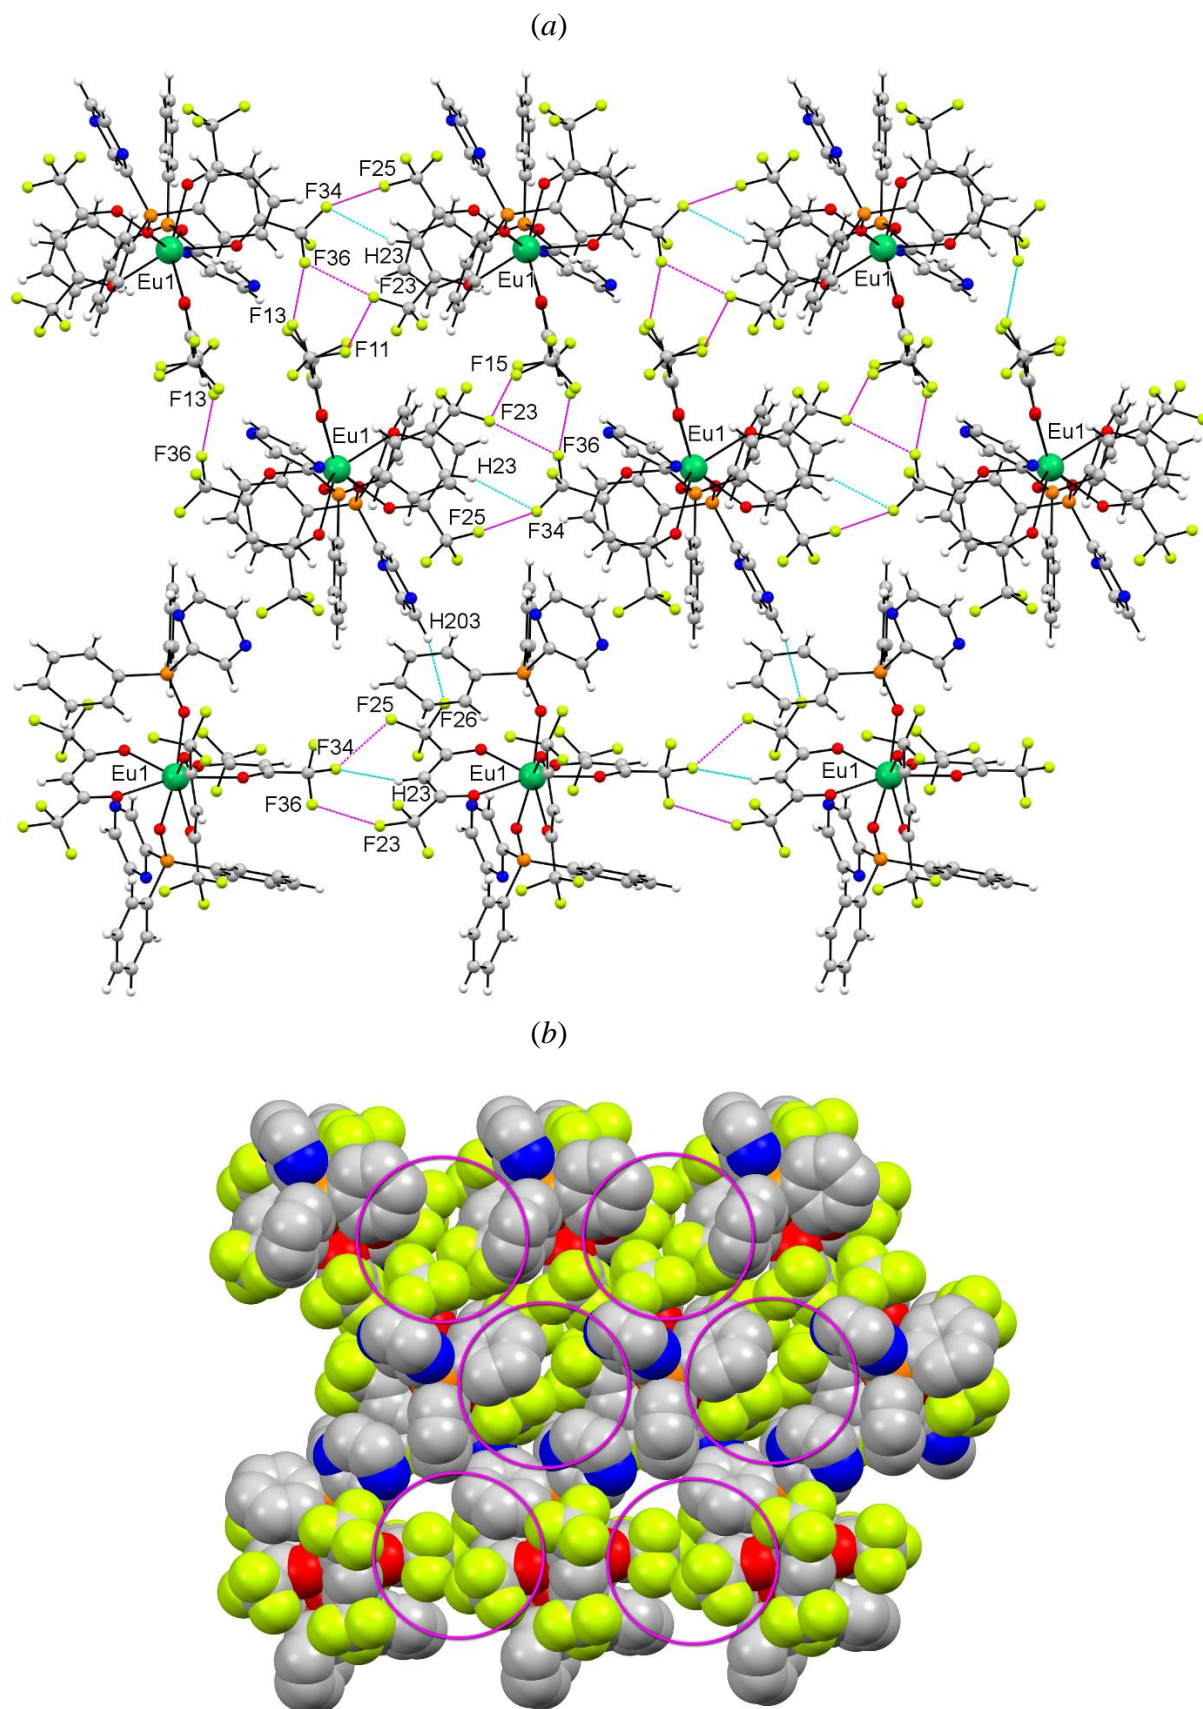

**Figure S4.** (a) Crystal structure of complex **5** focused on intermolecular C–H...F (cyan) and F...F (magenta) contacts, disordered atom positions are omitted for clarity; (b) space filling model focused on the intermolecular CF<sub>3</sub> arrangement in **5** (disordered atom positions and hydrogen atoms are omitted).

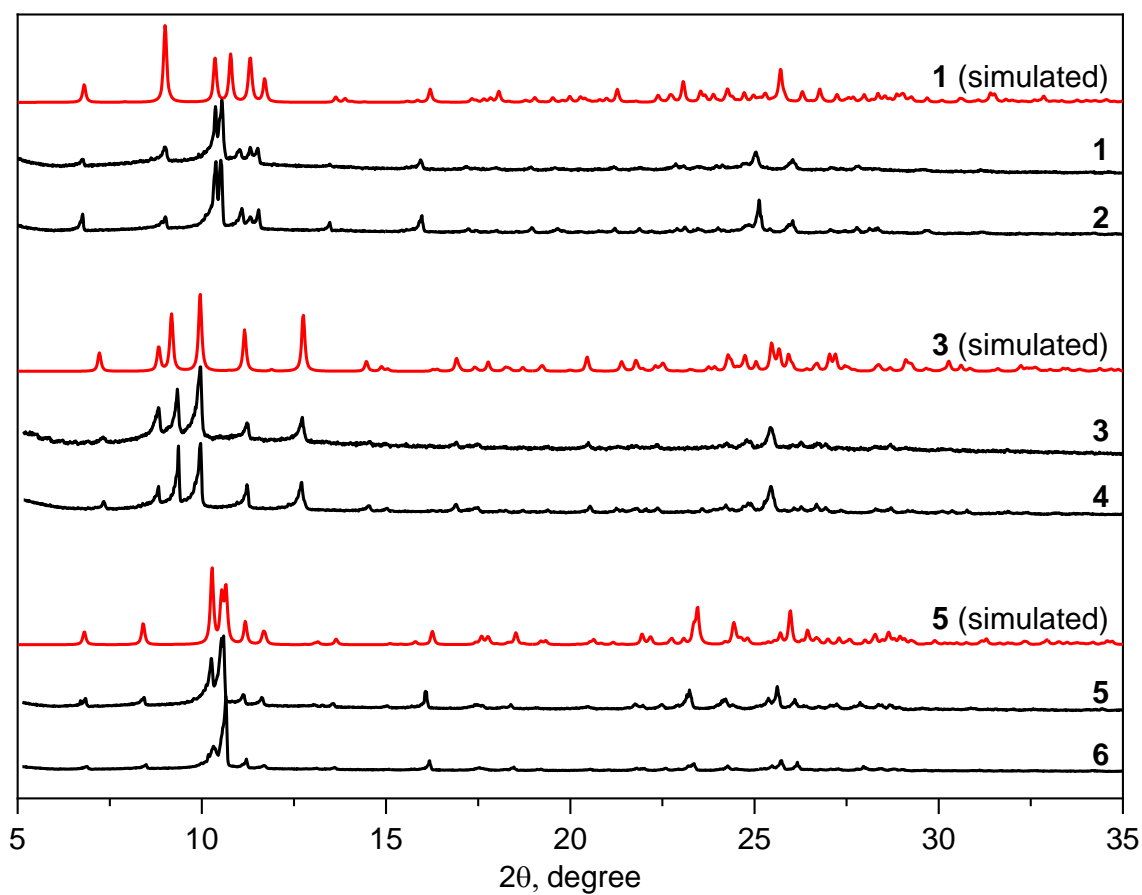

**Figure S5.** Simulated XRPD pattern of **1**, **3**, and **5** (red), and experimental ones of complexes **1–6** (black).

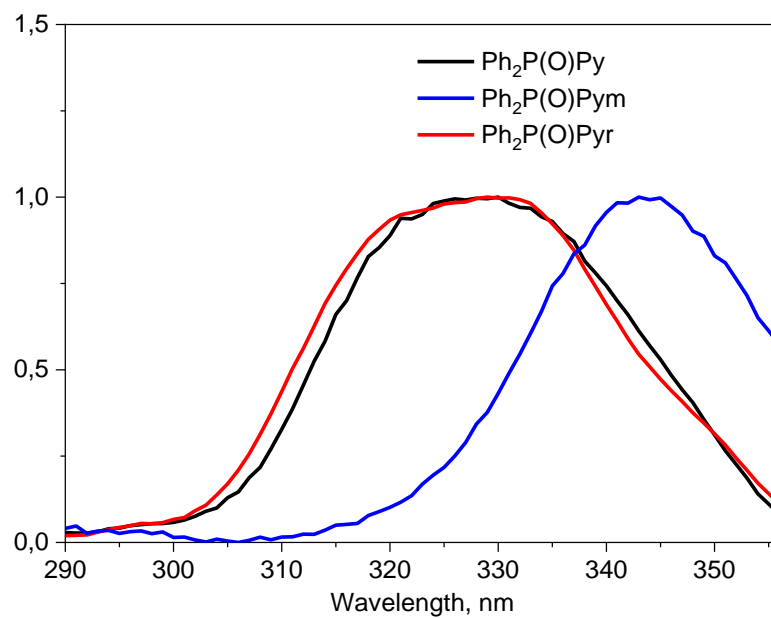

**Figure S6.** Normalized photoluminescence excitation spectra of Ph<sub>2</sub>P(O)Py, Ph<sub>2</sub>P(O)Pym, and Ph<sub>2</sub>P(O)Pyr at  $\lambda_{em} = 370$  nm.

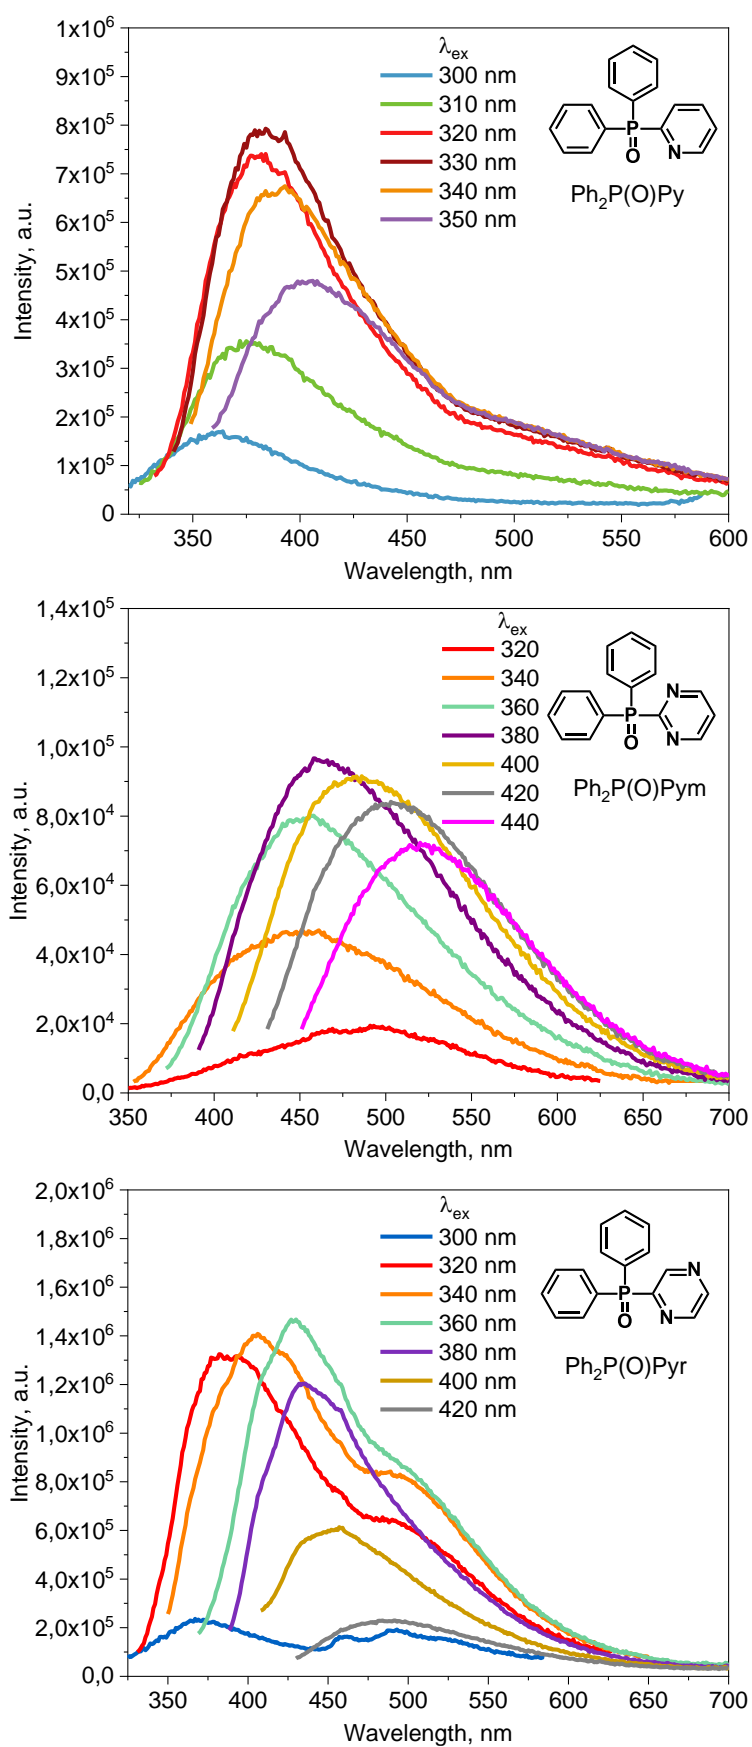

**Fig. S7.** Photoluminescence spectra of  $\text{Ph}_2\text{P}(\text{O})\text{Py}$ ,  $\text{Ph}_2\text{P}(\text{O})\text{Pym}$ , and  $\text{Ph}_2\text{P}(\text{O})\text{Pyr}$  recorded at different excitation wavelengths ( $\lambda_{\text{ex}}$ ) in the solid state at 300 K.

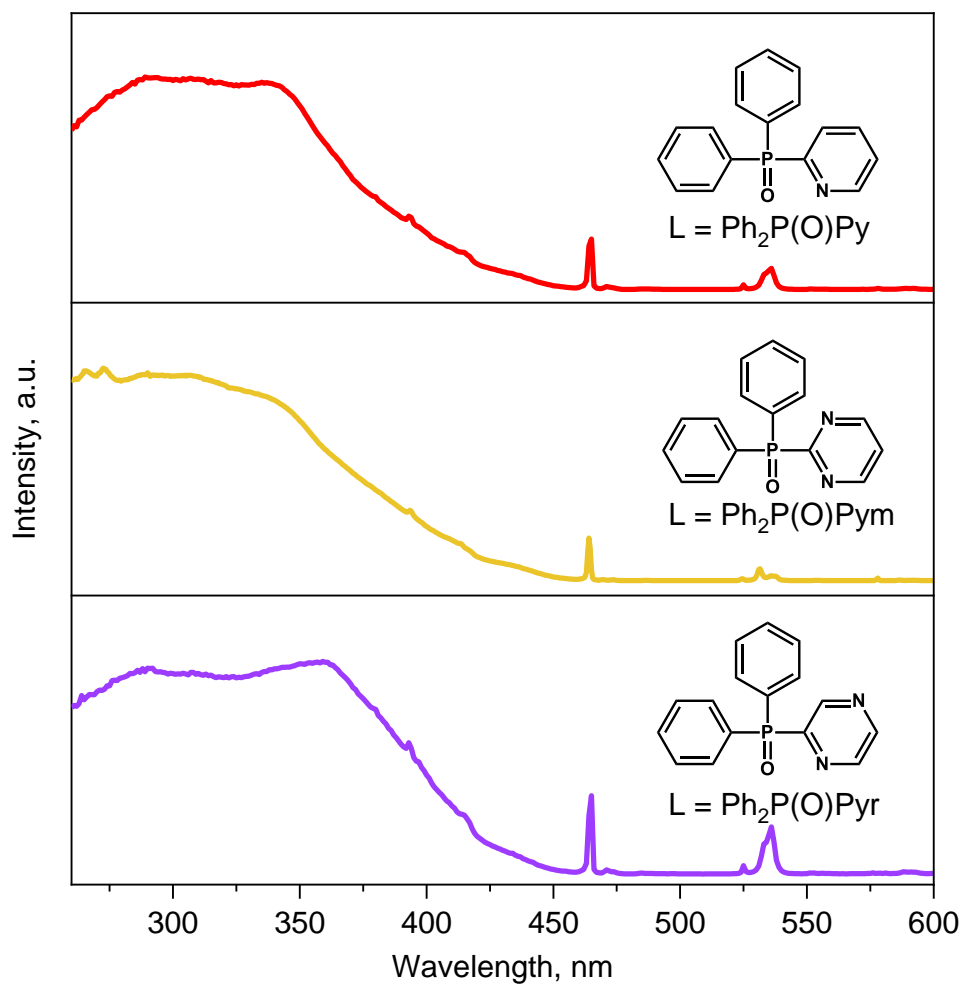

**Figure S8.** Normalized photoluminescence excitation spectra of the complexes [EuL<sub>2</sub>(hfac)<sub>3</sub>], where L is Ph<sub>2</sub>P(O)Py (**1**), Ph<sub>2</sub>P(O)Pym (**3**), or Ph<sub>2</sub>P(O)Pyr (**5**).

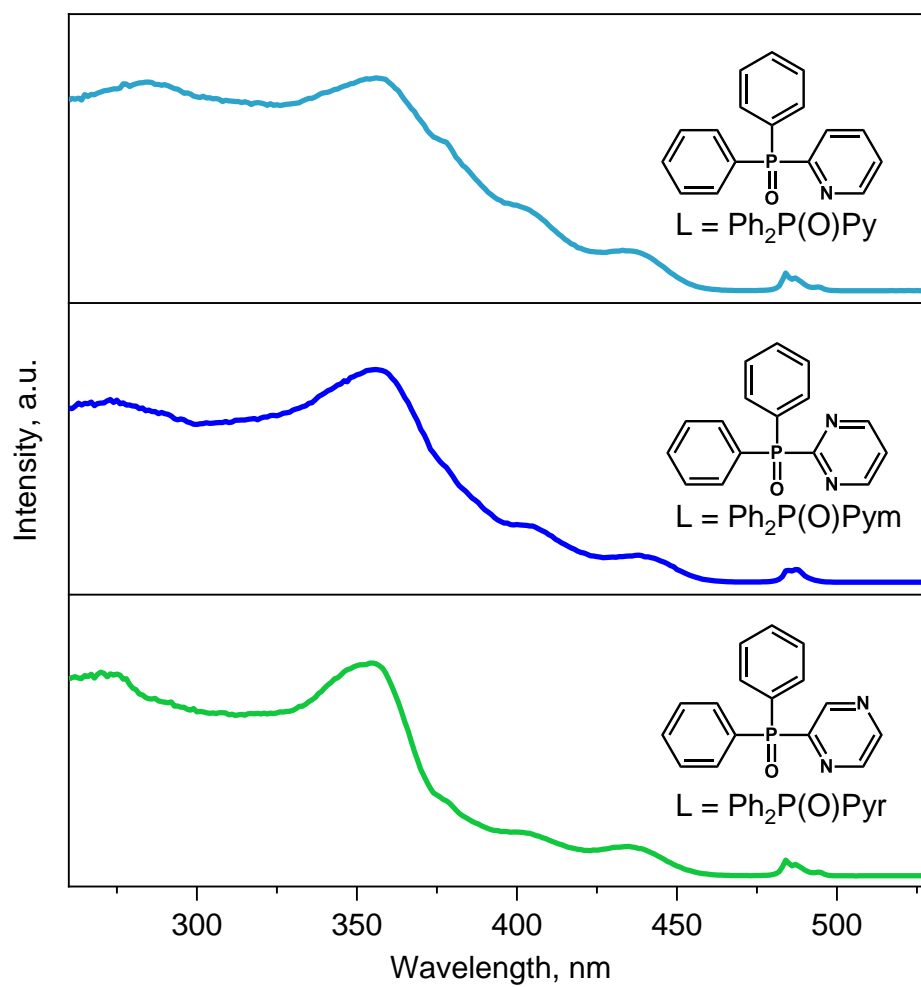

**Fig. S9.** Normalized photoluminescence excitation spectra of the complexes  $[TbL_2(hfac)_3]$ , where L is  $Ph_2P(O)Py$  (**2**),  $Ph_2P(O)Pym$  (**4**), or  $Ph_2P(O)Pyr$  (**6**).

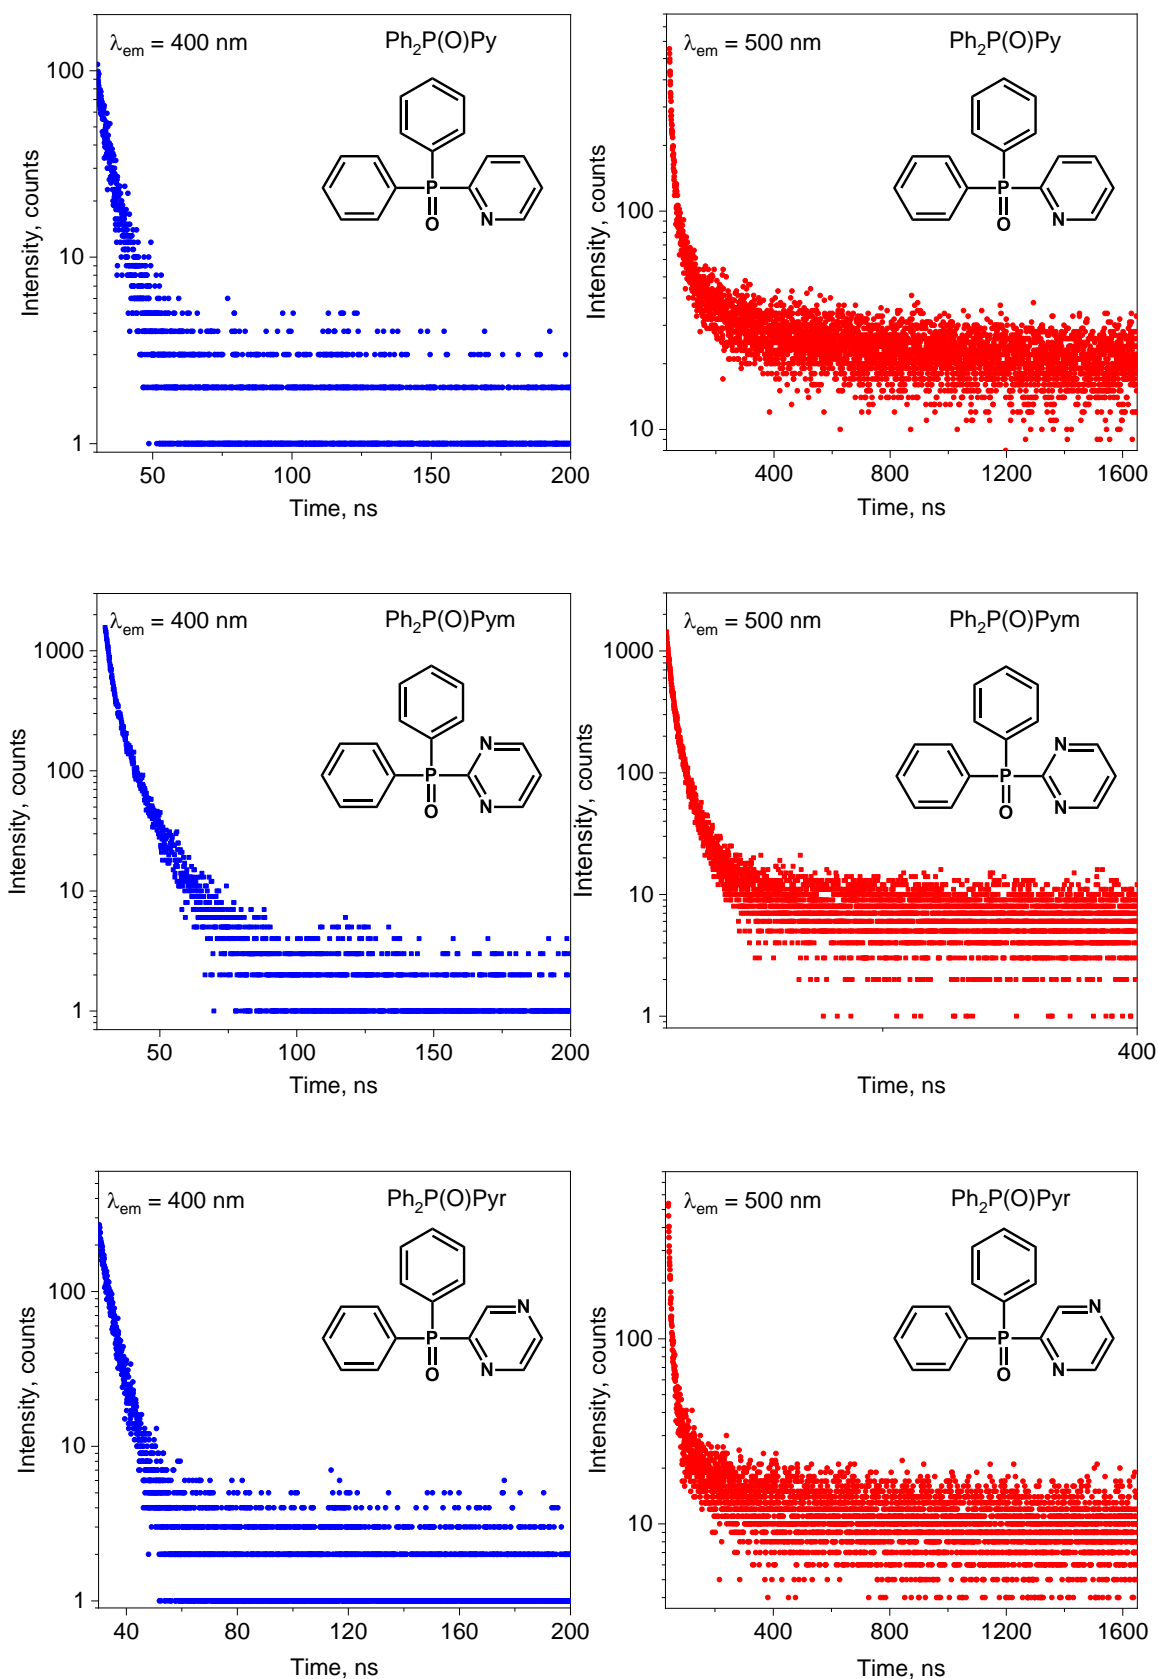

**Fig. S10.** Kinetics of photoluminescence decay of  $\text{Ph}_2\text{P}(\text{O})\text{Py}$ ,  $\text{Ph}_2\text{P}(\text{O})\text{Pym}$ , and  $\text{Ph}_2\text{P}(\text{O})\text{Pyr}$  at  $\lambda_{\text{em}} = 400$  and 500 nm in the solid state at 300 K ( $\lambda_{\text{ex}} = 350$  nm).
